# Supplementary material
Source: PubMed Central journal article supplement (PMC2596345)

**Supplementary Figure 1.** Reconstructed chromatograms for ions of peptide KYSAELHVAHWNSAKY from carbonic anhydrase I

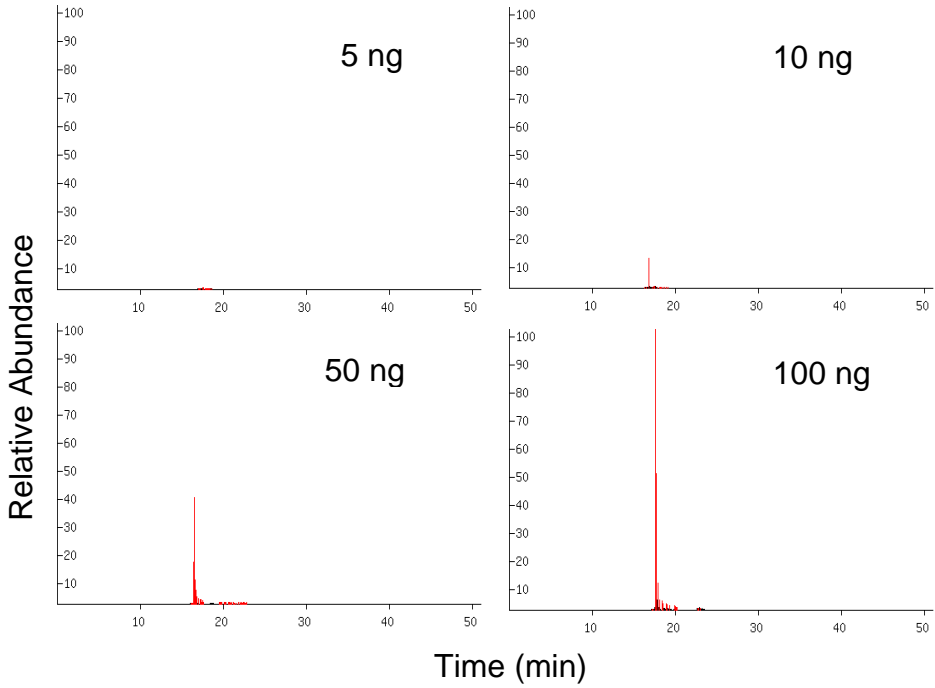

**Supplementary Figure 2.** (a & b). Frequency of GO terms in VSMC secretome annotation.

For each GO category, frequencies of GO terms in GO annotations of proteins included in the

VSMC secretome are shown as percentages. GO terms were ordered by frequency of

occurrence. (c). Relative distribution of VSMC secretory proteins by spectral counting.

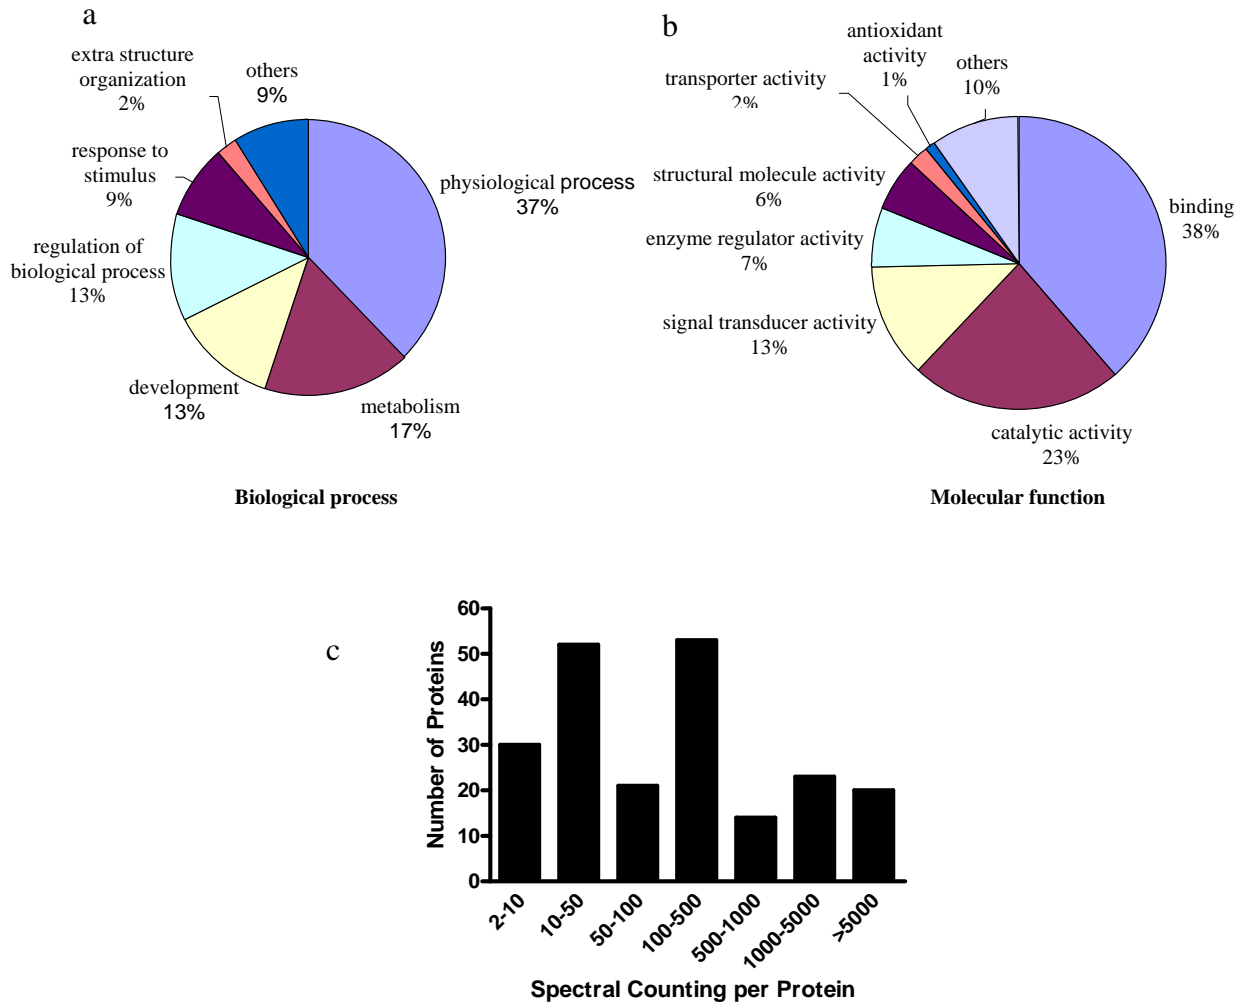

Supplement: M800104-MCP200_1.pdf [file M800104-MCP200_1.pdf]
